# Supplementary material
Source: HighWire-hosted journal article supplement (https://heart.bmj.com/content/heartjnl-2019-315900)
Supplement: inline-supplementary-material-3 [file inline-supplementary-material-3.xlsx]

## Sheet: Sheet1
PATHWAY_SORTORDER	BIOCHEMICAL	SUPER_PATHWAY	SUB_PATHWAY	COMP_ID	PLATFORM	CHEMICAL_ID	RI	MASS	CAS	PUBCHEM	CHEMSPIDER	KEGG	HMDB_ID
1203	1,11-undecanedicarboxylate	Lipid	Fatty Acid, Dicarboxylate	43027	LC/MS Neg	100004262	3578	243.2	505-52-2	10458	10026		HMDB02327
3004	1,3,7-trimethylurate	Xenobiotics	Xanthine Metabolism	34404	LC/MS Neg	100001397	1988	209.1	5415-44-1	79437	71754	C16361	HMDB02123
839	1,5-anhydroglucitol (1,5-AG)	Carbohydrate	Glycolysis, Gluconeogenesis, and Pyruvate Metabolism	20675	LC/MS Neg	100000580	808	163.2	154-58-5	64960		C07326	HMDB02712
3002	1,7-dimethylurate	Xenobiotics	Xanthine Metabolism	34400	LC/MS Neg	100001399	1607	195.1	33868-03-0	91611	82720	C16356	HMDB11103
1793	1-(1-enyl-oleoyl)-GPE (P-18:1)*	Lipid	Lysoplasmalogen	44621	LC/MS Neg	100005372	6105.2	462.5
1791	1-(1-enyl-palmitoyl)-GPE (P-16:0)*	Lipid	Lysoplasmalogen	39270	LC/MS Neg	100003000	6153	436.4			10471193
1795	1-(1-enyl-stearoyl)-GPE (P-18:0)*	Lipid	Lysoplasmalogen	39271	LC/MS Neg	100003001	6500	464.4
1689	1-arachidonoyl-GPC (20:4n6)*	Lipid	Lysolipid	34061	LC/MS Neg	100001551	5900	618.1			21403155	C05208	HMDB10395
1715	1-arachidonoyl-GPE (20:4n6)*	Lipid	Lysolipid	35186	LC/MS Neg	100001571	5731	500.3		42607465	21403171		HMDB11517
1736	1-arachidonoyl-GPI (20:4)*	Lipid	Lysolipid	34214	LC/MS Neg	100001654	5479	619.4					HMDB61690
3467	1-hydroxy-2-naphthalenecarboxylate	Xenobiotics	Drug	38140	LC/MS Neg	100002394	3929	187.1	86-48-6	6844	6583	C03203
1679	1-linolenoyl-GPC (18:3)*	Lipid	Lysolipid	44562	LC/MS Pos	100005350	5527.9	518.4
1677	1-linoleoyl-GPC (18:2)	Lipid	Lysolipid	34419	LC/MS Pos	100001395	5574	520.4		11988421	10160888	C04100	HMDB10386
1711	1-linoleoyl-GPE (18:2)*	Lipid	Lysolipid	32635	LC/MS Neg	100001570	5725	476.3		52925130	21403170		HMDB11507
1815	1-linoleoylglycerol (18:2)	Lipid	Monoacylglycerol	27447	LC/MS Neg	100001040	6226	279.2	2277-28-3	5283469	4446589
1674	1-oleoyl-GPC (18:1)	Lipid	Lysolipid	33960	LC/MS Neg	100001272	6120	596	19420-56-5	16081932	17240641		HMDB02815
1707	1-oleoyl-GPE (18:1)	Lipid	Lysolipid	35628	LC/MS Neg	100001569	5928	478.3	89576-29-4	9547071	7826021		HMDB11506
1730	1-oleoyl-GPI (18:1)*	Lipid	Lysolipid	36602	LC/MS Neg	100001777	5577	597.4
1813	1-oleoylglycerol (18:1)	Lipid	Monoacylglycerol	21184	LC/MS Neg	100000924	6457	281.4	111-03-5	5283468	4446588		HMDB11567
1668	1-palmitoleoyl-GPC (16:1)*	Lipid	Lysolipid	33230	LC/MS Pos	100001511	5524	494.3		24779461	21403152		HMDB10383
1665	1-palmitoyl-GPC (16:0)	Lipid	Lysolipid	33955	LC/MS Neg	100001263	6046	570	17364-16-8	86554	78064		HMDB10382
1702	1-palmitoyl-GPE (16:0)	Lipid	Lysolipid	35631	LC/MS Neg	100001567	5940	452.3		9547069	7826019		HMDB11503
1725	1-palmitoyl-GPI (16:0)*	Lipid	Lysolipid	35305	LC/MS Neg	100001655	5573	571.3					HMDB61695
1808	1-palmitoylglycerol (16:0)	Lipid	Monoacylglycerol	21127	LC/MS Neg	100000827	6250	255.4	542-44-9	14900	14201		HMDB31074
1672	1-stearoyl-GPC (18:0)	Lipid	Lysolipid	39375	LC/MS Neg	100001271	6600.7	598.1	19420-57-6	497299	435389		HMDB10384
1705	1-stearoyl-GPE (18:0)	Lipid	Lysolipid	34416	LC/MS Neg	100001461	6200	480.4	69747-55-3	9547068	7826018		HMDB11130
1752	1-stearoyl-GPG (18:0)	Lipid	Lysolipid	34437	LC/MS Neg	100001462	5826	511.4			21403138
1728	1-stearoyl-GPI (18:0)	Lipid	Lysolipid	19324	LC/MS Neg	100000656	5800	599.4	796963-93-4		21403067		HMDB61696
1071	10-heptadecenoate (17:1n7)	Lipid	Long Chain Fatty Acid	33971	LC/MS Neg	100001278	5558	267.3	29743-97-3	5312435	4471860		HMDB60038
1081	10-nonadecenoate (19:1n9)	Lipid	Long Chain Fatty Acid	33972	LC/MS Neg	100001277	5775	295.4	73033-09-7	5312513	4471938		HMDB13622
1060	10-undecenoate (11:1n1)	Lipid	Medium Chain Fatty Acid	32497	LC/MS Neg	100001197	5086	183.3	1333-28-4		10771160
1350	13-HODE + 9-HODE	Lipid	Fatty Acid, Monohydroxy	37752	LC/MS Neg	100002196	5270	295.2		43013
1171	15-methylpalmitate	Lipid	Fatty Acid, Branched	38768	LC/MS Neg	100002945	5698	269.4		17903417
1174	17-methylstearate	Lipid	Fatty Acid, Branched	38296	LC/MS Neg	100002356	5987	297.4	2724-59-6	3083779	2340933
340	2-aminobutyrate	Amino Acid	Methionine, Cysteine, SAM and Taurine Metabolism	32348	LC/MS Pos	1128	758	104.1	1492-24-6	439691	388757	C02261	HMDB00650
3450	2-hydroxyacetaminophen sulfate*	Xenobiotics	Drug	33173	LC/MS Neg	100001791	1703	246.1
1324	2-hydroxydecanoate	Lipid	Fatty Acid, Monohydroxy	42489	LC/MS Neg	100004089	4826	187.2	5393-81-7	21488	20195
2935	2-hydroxyhippurate (salicylurate)	Xenobiotics	Benzoate Metabolism	18281	LC/MS Neg	1869	2252	194.1	487-54-7	10253	9835	C07588	HMDB00840
3461	2-hydroxyibuprofen	Xenobiotics	Drug	43330	LC/MS Pos	100004169	4470.7	240.1	51146-55-5
1326	2-hydroxypalmitate	Lipid	Fatty Acid, Monohydroxy	35675	LC/MS Neg	100001579	5508	271.3	764-67-0	92836	83805		HMDB31057
1327	2-hydroxystearate	Lipid	Fatty Acid, Monohydroxy	17945	LC/MS Neg	1239	5705	299.4	629-22-1	69417	62625	C03045
3457	2-methoxyacetaminophen glucuronide*	Xenobiotics	Drug	33161	LC/MS Pos	100001795	2069	375
3451	2-methoxyacetaminophen sulfate*	Xenobiotics	Drug	33178	LC/MS Neg	100001793	1977	260.1
299	2-methylbutyrylcarnitine (C5)	Amino Acid	Leucine, Isoleucine and Valine Metabolism	35431	LC/MS Pos	100001509	2439	246.1	31023-25-3	6426901	4932320		HMDB00378
1666	2-palmitoyl-GPC (16:0)*	Lipid	Lysolipid	35253	LC/MS Pos	100001562	5604	496.3		15061532	21403165		HMDB61702
3024	2-piperidinone	Xenobiotics	Food Component/Plant	43400	LC/MS Pos	100004295	2034	100.1	675-20-7	12665	12144
1673	2-stearoyl-GPC (18:0)*	Lipid	Lysolipid	35255	LC/MS Pos	100001555	5780	524.4		10208382	8383879
1954	21-hydroxypregnenolone disulfate	Lipid	Steroid	37173	LC/MS Neg	100001999	3931	245.3	1164-98-3	134595	118625	C05485	HMDB04026
186	3-(3-hydroxyphenyl)propionate	Amino Acid	Phenylalanine and Tyrosine Metabolism	35635	LC/MS Neg	100001624	2000	165.1	621-54-5	91	89	C11457	HMDB00375
134	3-(4-hydroxyphenyl)lactate	Amino Acid	Phenylalanine and Tyrosine Metabolism	32197	LC/MS Neg	240	1395	181.1	6482-98-0	9378	9010	C03672	HMDB00755
3452	3-(cystein-S-yl)acetaminophen*	Xenobiotics	Drug	34365	LC/MS Pos	100001797	1960	271.2		5233914	4403253
3453	3-(N-acetyl-L-cystein-S-yl) acetaminophen*	Xenobiotics	Drug	18299	LC/MS Pos	2048	2622	313.1	52372-86-8	83967	75765
1210	3-carboxy-4-methyl-5-propyl-2-furanpropanoate (CMPF)	Lipid	Fatty Acid, Dicarboxylate	31787	LC/MS Neg	100001178	2815	239.1	86879-39-2	123979	110498		HMDB61112
305	3-hydroxy-2-ethylpropionate	Amino Acid	Leucine, Isoleucine and Valine Metabolism	32397	LC/MS Neg	100001170	971	117.2	4374-62-3	188979	164207		HMDB00396
1318	3-hydroxybutyrate (BHBA)	Lipid	Ketone Bodies	542	LC/MS Pos	254	1626	105.1	625-72-9	441	428	C01089	HMDB00357
1286	3-hydroxybutyrylcarnitine (1)	Lipid	Fatty Acid Metabolism(Acyl Carnitine)	43264	LC/MS Pos	100003926	1475	248.2		53481617			HMDB13127
1332	3-hydroxydecanoate	Lipid	Fatty Acid, Monohydroxy	22053	LC/MS Neg	100000997	4681	187.2	5561-87-5	26612	24790		HMDB02203
2936	3-hydroxyhippurate	Xenobiotics	Benzoate Metabolism	39600	LC/MS Neg	100002122	1670	194.1	1637-75-8	450268	396603		HMDB06116
3462	3-hydroxyibuprofen	Xenobiotics	Drug	43331	LC/MS Pos	100004170	4501.6	222.9	53949-54-5
1331	3-hydroxyoctanoate	Lipid	Fatty Acid, Monohydroxy	22001	LC/MS Neg	100000773	3463	159.2	88930-08-9	26613	24791		HMDB01954
226	3-indoxyl sulfate	Amino Acid	Tryptophan Metabolism	27672	LC/MS Neg	100000467	2258	212	2642-37-7	10258	9840		HMDB00682
156	3-methoxytyrosine	Amino Acid	Phenylalanine and Tyrosine Metabolism	12017	LC/MS Pos	1342	1765	212.1	300-48-1	1670	8948		HMDB01434
296	3-methyl-2-oxobutyrate	Amino Acid	Leucine, Isoleucine and Valine Metabolism	21047	LC/MS Neg	100000936	1489	115.1	3715-29-5	49	48	C00141	HMDB00019
297	3-methyl-2-oxovalerate	Amino Acid	Leucine, Isoleucine and Valine Metabolism	15676	LC/MS Neg	100000036	2106	129.2	1460-34-0;51829-07-3	47	46	C00671	HMDB03736
279	3-methylglutarylcarnitine (C6)	Amino Acid	Leucine, Isoleucine and Valine Metabolism	37060	LC/MS Pos	100001742	1900	290.1	102673-95-0	128145	113619		HMDB00552
61	3-methylhistidine	Amino Acid	Histidine Metabolism	15677	LC/MS Neg	100000042	911	168.1	368-16-1	64969	58494	C01152	HMDB00479
3006	3-methylxanthine	Xenobiotics	Xanthine Metabolism	32445	LC/MS Pos	100001108	1866	167.1	1076-22-8	70639	63805	C16357	HMDB01886
409	4-acetamidobutanoate	Amino Acid	Polyamine Metabolism	1558	LC/MS Pos	1113	1724	146.1	3025-96-5	18189	17180	C02946	HMDB03681
3455	4-acetamidophenol	Xenobiotics	Drug	12032	LC/MS Pos	1383	2238	152.1	103-90-2	1983	1906	C06804	HMDB01859
3456	4-acetamidophenylglucuronide	Xenobiotics	Drug	33423	LC/MS Neg	100000043	1377	326.1	120595-80-4	83944	3239926		HMDB10316
3454	4-acetaminophen sulfate	Xenobiotics	Drug	37475	LC/MS Neg	2049	1779	230.1	10066-90-7;32113-41-0	83939	75741	C06804	HMDB59911
2009	4-androsten-3beta,17beta-diol disulfate (1)*	Lipid	Steroid	37202	LC/MS Neg	100001992	3735	224.3		10634		C04295	HMDB03818
2010	4-androsten-3beta,17beta-diol disulfate (2)*	Lipid	Steroid	37203	LC/MS Neg	100001994	4073	224.3		10634		C04295	HMDB03818
3883	4-hydroxychlorothalonil	Xenobiotics	Chemical	48441	LC/MS Neg	100006082	4456	244.908	28343-61-5	34217	31530
2937	4-hydroxyhippurate	Xenobiotics	Benzoate Metabolism	35527	LC/MS Neg	100001423	1439	194	2482-25-9	151012	133104		HMDB13678
118	4-hydroxyphenylacetate	Amino Acid	Phenylalanine and Tyrosine Metabolism	541	LC/MS Neg	144	1388	151.1	156-38-7	127	3881560	C00642	HMDB00020
268	4-methyl-2-oxopentanoate	Amino Acid	Leucine, Isoleucine and Valine Metabolism	22116	LC/MS Neg	100000551	2200	129.2	816-66-0	70	69	C00233	HMDB00695
2965	4-methylcatechol sulfate	Xenobiotics	Benzoate Metabolism	42493	LC/MS Neg	100004111	2666.4	203
2773	5-methyluridine (ribothymidine)	Nucleotide	Pyrimidine Metabolism, Uracil containing	35136	LC/MS Neg	100001446	1774	257.1	1463-10-1	445408	393058		HMDB00884
424	5-oxoproline	Amino Acid	Glutathione Metabolism	1494	LC/MS Neg	1021	744	128.2	98-79-3	7405	7127	C01879	HMDB00267
2024	5alpha-androstan-3beta,17beta-diol disulfate	Lipid	Steroid	37190	LC/MS Neg	100001987	3872	225.2	571-20-0	242332		C12525	HMDB00493
1972	5alpha-pregnan-3alpha,20beta-diol disulfate 1*	Lipid	Steroid	37201	LC/MS Neg	100002016	4287	239.3
1970	5alpha-pregnan-3beta,20alpha-diol disulfate	Lipid	Steroid	37198	LC/MS Neg	100001988	3962	239.3
1911	7-alpha-hydroxy-3-oxo-4-cholestenoate (7-Hoca)	Lipid	Sterol	36776	LC/MS Neg	100001609	5268	429.4	115538-85-7	3081085	2338765	C17337	HMDB12458
2740	7-methylguanine	Nucleotide	Purine Metabolism, Guanine containing	35114	LC/MS Pos	100001456	1353	166.1	578-76-7	11361	10883	C02242	HMDB00897
3007	7-methylxanthine	Xenobiotics	Xanthine Metabolism	34390	LC/MS Pos	100001396	1778	167.1	552-62-5	68374	61660	C16353	HMDB01991
1380	9,10-epoxystearate	Lipid	Fatty Acid, Oxidized	39627	LC/MS Neg	100003063	5386.6	297.4	2443-39-2	15868	15081	C19418
1285	acetylcarnitine	Lipid	Fatty Acid Metabolism(Acyl Carnitine)	32198	LC/MS Pos	100000802	1203	204.2	5080-50-2	1	5406074	C02571	HMDB00201
400	acisoga	Amino Acid	Polyamine Metabolism	43258	LC/MS Pos	100004541	2317.9	185.3	106692-36-8	129397	114601
2697	adenosine 5'-monophosphate (AMP)	Nucleotide	Purine Metabolism, Adenine containing	32342	LC/MS Pos	209	1210	348.1	149022-20-8	6083	10239183	C00020	HMDB00045
1114	adrenate (22:4n6)	Lipid	Polyunsaturated Fatty Acid (n3 and n6)	32980	LC/MS Neg	100001193	5684	331.3	2091-25-0	5497181	4445971	C16527	HMDB02226
827	ADSGEGDFXAEGGGVR*	Peptide	Fibrinogen Cleavage Peptide	33084	LC/MS Pos	100001322	3239	769		16133137	14654187
27	alanine	Amino Acid	Alanine and Aspartate Metabolism	1126	LC/MS Pos	811	650	90.1	56-41-7	5950	5735	C00041	HMDB00161
283	alpha-hydroxyisovalerate	Amino Acid	Leucine, Isoleucine and Valine Metabolism	33937	LC/MS Neg	100001300	1142	117.1	600-37-3	99823	90190		HMDB00407
2030	andro steroid monosulfate 2*	Lipid	Steroid	32792	LC/MS Neg	100002068	4240	383.2				C04555	HMDB02759
1999	androsterone sulfate	Lipid	Steroid	31591	LC/MS Neg	100001073	5011	369.2	2479-86-9	159663	19988780		HMDB02759
1083	arachidate (20:0)	Lipid	Long Chain Fatty Acid	44679	LC/MS Neg	893	6282	311.3	506-30-9	10467	10035	C06425	HMDB02212
1113	arachidonate (20:4n6)	Lipid	Polyunsaturated Fatty Acid (n3 and n6)	1110	LC/MS Neg	229	5525	303.4	506-32-1	444899	392692	C00219	HMDB01043
362	arginine	Amino Acid	Urea cycle; Arginine and Proline Metabolism	1638	LC/MS Pos	231	650	175.2	1119-34-2	232	227	C00062	HMDB00517
1200	azelate (nonanedioate)	Lipid	Fatty Acid, Dicarboxylate	18362	LC/MS Neg	2029	1322	187.2	123-99-9	2266	2179	C08261	HMDB00784
276	beta-hydroxyisovalerate	Amino Acid	Leucine, Isoleucine and Valine Metabolism	12129	LC/MS Neg	1442	1043	117.1	625-08-1	69362	62571		HMDB00754
6	betaine	Amino Acid	Glycine, Serine and Threonine Metabolism	3141	LC/MS Pos	799	721	118.2	107-43-7	247	24219951173	C00719	HMDB00043
2902	bilirubin (E,E)*	Cofactors and Vitamins	Hemoglobin and Porphyrin Metabolism	32586	LC/MS Pos	100001950	4625	585.2	114-25-0	5315454	4474753
2901	bilirubin (Z,Z)	Cofactors and Vitamins	Hemoglobin and Porphyrin Metabolism	27716	LC/MS Neg	1090	4812	583.2	635-65-4	5280352	4444055	C00486	HMDB00054
2904	biliverdin	Cofactors and Vitamins	Hemoglobin and Porphyrin Metabolism	2137	LC/MS Neg	250	4671	581.2	55482-27-4;55482-27-4	5353439	10628548	C00500	HMDB01008
1268	butyrylcarnitine	Lipid	Fatty Acid Metabolism (also BCAA Metabolism)	32412	LC/MS Pos	100001054	2007	232.2	25576-40-3	439829	184820	C02862	HMDB02013
258	C-glycosyltryptophan	Amino Acid	Tryptophan Metabolism	48782	LC/MS Pos	100006379	1920	367.15	180509-18-6	10981970	9157171
2995	caffeine	Xenobiotics	Xanthine Metabolism	569	LC/MS Pos	849	2820	195.1	58-08-2	2519	2424	C07481	HMDB01847
1058	caprate (10:0)	Lipid	Medium Chain Fatty Acid	1642	LC/MS Neg	888	5092	171.2	112-37-8	2969	2863	C01571	HMDB00511
1054	caproate (6:0)	Lipid	Medium Chain Fatty Acid	32489	LC/MS Neg	926	2766	115.2	142-62-1	8892	8552	C01585	HMDB00535
1056	caprylate (8:0)	Lipid	Medium Chain Fatty Acid	32492	LC/MS Neg	932	4367	143.2	124-07-2	379	370	C06423	HMDB00482
3463	carboxyibuprofen	Xenobiotics	Drug	43333	LC/MS Neg	100004171	1934	235	15935-54-3	10444113	8619532
1313	carnitine	Lipid	Carnitine Metabolism	15500	LC/MS Pos	100000007	702	162.2	461-05-2	10917	10455	C00318	HMDB00062
2960	catechol sulfate	Xenobiotics	Benzoate Metabolism	35320	LC/MS Neg	100001605	1928	188.9	4918-96-1	3083879	2341024	C00090	HMDB59724
2068	cholate	Lipid	Primary Bile Acid Metabolism	22842	LC/MS Neg	136	5148	407.4	81-25-4	221493		C00695	HMDB00619
1497	choline	Lipid	Phospholipid Metabolism	15506	LC/MS Pos	1256	674	104.2	67-48-1	305	149278	C00114	HMDB00097
1027	citrate	Energy	TCA Cycle	1564	LC/MS Neg	1124	591	191.1	77-92-9	311	305	C00158	HMDB00094
367	citrulline	Amino Acid	Urea cycle; Arginine and Proline Metabolism	2132	LC/MS Pos	391	715	176.1	372-75-8	9750	810	C00327	HMDB00904
1985	corticosterone	Lipid	Steroid	5983	LC/MS Pos	272	4856	347.2	50-22-6	5753	5550	C02140	HMDB01547
1983	cortisol	Lipid	Steroid	1712	LC/MS Pos	356	4573	363.2	50-23-7	5754		C00735	HMDB00063
1988	cortisone	Lipid	Steroid	1769	LC/MS Pos	273	4420	361.2	53-06-5	222786	361685	C00762	HMDB02802
391	creatine	Amino Acid	Creatine Metabolism	27718	LC/MS Pos	1221	758	132.1	57-00-1	586	566	C00300	HMDB00064
392	creatinine	Amino Acid	Creatine Metabolism	513	LC/MS Pos	275	730	114.1	60-27-5	588	568	C00791	HMDB00562
423	cys-gly, oxidized	Amino Acid	Glutathione Metabolism	18368	LC/MS Neg	1224	955	353.1	7729-20-6	333293	295316
419	cysteine-glutathione disulfide	Amino Acid	Glutathione Metabolism	35159	LC/MS Pos	100001437	821	427.1	13081-14-6	4247235	3455404		HMDB00656
1292	decanoylcarnitine	Lipid	Fatty Acid Metabolism(Acyl Carnitine)	33941	LC/MS Pos	100001251	4700	316.3	1492-27-9	10245190	8420677		HMDB00651
1993	dehydroisoandrosterone sulfate (DHEA-S)	Lipid	Steroid	32425	LC/MS Neg	100000792	4771	367.2	651-48-9	12594	12074	C04555	HMDB01032
1312	deoxycarnitine	Lipid	Carnitine Metabolism	36747	LC/MS Pos	100001662	759	146.1	6249-56-5	134	705	C01181	HMDB01161
3531	dexamethasone	Xenobiotics	Drug	42618	LC/MS Pos	100004014	4776	393.1	50-02-2	5743	5541	D00292	HMDB15364
1117	dihomo-linoleate (20:2n6)	Lipid	Polyunsaturated Fatty Acid (n3 and n6)	17805	LC/MS Neg	1231	5722	307.3	2091-39-6	6439848	4944228	C16525	HMDB05060
1112	dihomo-linolenate (20:3n3 or n6)	Lipid	Polyunsaturated Fatty Acid (n3 and n6)	35718	LC/MS Neg	100001739	5600	305.4	17046-59-2	5280581	4471954	C03242	HMDB02925
1116	docosadienoate (22:2n6)	Lipid	Polyunsaturated Fatty Acid (n3 and n6)	32415	LC/MS Neg	100001182	6017	335.4	7370-49-2	5282807	4445934	C16533	HMDB61714
1104	docosahexaenoate (DHA; 22:6n3)	Lipid	Polyunsaturated Fatty Acid (n3 and n6)	19323	LC/MS Neg	100000665	5518	327.3	6217-54-5	445580	393183	C06429	HMDB02183
1103	docosapentaenoate (n3 DPA; 22:5n3)	Lipid	Polyunsaturated Fatty Acid (n3 and n6)	32504	LC/MS Neg	100001181	5574	329.4	2234-74-4	6441454		C16513	HMDB01976
1115	docosapentaenoate (n6 DPA; 22:5n6)	Lipid	Polyunsaturated Fatty Acid (n3 and n6)	37478	LC/MS Neg	100001580	5625	329.4	25182-74-5	6441454	4945614	C16513	HMDB01976
1204	dodecanedioate	Lipid	Fatty Acid, Dicarboxylate	32388	LC/MS Neg	100001102	2990	229.2	693-23-2	12736	12213	C02678	HMDB00623
828	DSGEGDFXAEGGGVR*	Peptide	Fibrinogen Cleavage Peptide	31548	LC/MS Pos	100001323	3379	733.5			21403111
3836	EDTA	Xenobiotics	Chemical	32511	LC/MS Neg	100001002	611	291.1	60-00-4	6049	5826	C00284	HMDB15109
1102	eicosapentaenoate (EPA; 20:5n3)	Lipid	Polyunsaturated Fatty Acid (n3 and n6)	18467	LC/MS Neg	2050	5442	301.3	10-2005-9;10417-94-4	446284	393682	C06428	HMDB01999
1086	eicosenoate (20:1)	Lipid	Long Chain Fatty Acid	33587	LC/MS Neg	100001335	5955	309.4		5282768	4445895		HMDB02231
1996	epiandrosterone sulfate	Lipid	Steroid	33973	LC/MS Neg	100001287	4838	369.3	22229-22-7		21403101	C07635	HMDB00365
1091	erucate (22:1n9)	Lipid	Long Chain Fatty Acid	1552	LC/MS Neg	1087	6273.3	337.4	112-86-7	5281116	7924	C08316	HMDB02068
3543	escitalopram	Xenobiotics	Drug	40459	LC/MS Pos	100003444	3855	325.2	219861-08-2	146570	129277		HMDB05028
3553	furosemide	Xenobiotics	Drug	43009	LC/MS Neg	100004241	3516	329.1	54-31-9	3440	3322	D00331	HMDB01933
2872	gamma-CEHC	Cofactors and Vitamins	Tocopherol Metabolism	37462	LC/MS Neg	100002094	3818	263.3	178167-75-4	133098	117455		HMDB01931
2873	gamma-CEHC glucuronide*	Cofactors and Vitamins	Tocopherol Metabolism	42381	LC/MS Neg	100004243	2540	439.2
438	gamma-glutamylisoleucine*	Peptide	Gamma-glutamyl Amino Acid	34456	LC/MS Pos	100001485	2644	261.2		14253342	21403145		HMDB11170
439	gamma-glutamylleucine	Peptide	Gamma-glutamyl Amino Acid	18369	LC/MS Pos	1268	2744	261.2	2566-39-4	151023	133115		HMDB11171
441	gamma-glutamylmethionine	Peptide	Gamma-glutamyl Amino Acid	37539	LC/MS Pos	100001313	1993	279.2	17663-87-5	7009567	5373147		HMDB29155
442	gamma-glutamylphenylalanine	Peptide	Gamma-glutamyl Amino Acid	33422	LC/MS Pos	100000491	2846	295.1	7432-24-8	111299	99868		HMDB00594
445	gamma-glutamyltyrosine	Peptide	Gamma-glutamyl Amino Acid	2734	LC/MS Pos	1102	2073	311.2	7432-23-7	94340	85142		HMDB11741
446	gamma-glutamylvaline	Peptide	Gamma-glutamyl Amino Acid	32393	LC/MS Pos	100001126	2040	247.2	2746-34-1	7015683			HMDB11172
41	glutamate	Amino Acid	Glutamate Metabolism	57	LC/MS Pos	561	700	148.1	56-86-0	611	591	C00025	HMDB00148
42	glutamine	Amino Acid	Glutamate Metabolism	53	LC/MS Pos	563	684	147.2	56-85-9	5961	5746	C00064	HMDB00641
91	glutarylcarnitine (C5)	Amino Acid	Lysine Metabolism	35439	LC/MS Pos	100001593	1565	276.1	102636-82-8	71464488	21403175		HMDB13130
1797	glycerol	Lipid	Glycerolipid Metabolism	15122	LC/MS Pos	1254	760	93.1	56-81-5	753	733	C00116	HMDB00131
2072	glycochenodeoxycholate	Lipid	Primary Bile Acid Metabolism	32346	LC/MS Neg	1628	5245	448.4	16564-43-5	12544		C05466	HMDB00637
2069	glycocholate	Lipid	Primary Bile Acid Metabolism	18476	LC/MS Neg	342	5104	464.4	475-31-0;863-57-0	10140	9734	C01921	HMDB00138
2115	glycocholenate sulfate*	Lipid	Secondary Bile Acid Metabolism	32599	LC/MS Neg	100001989	4763	254.8
2106	glycohyocholate	Lipid	Secondary Bile Acid Metabolism	42574	LC/MS Neg	100004083	5010	464.3
2093	glycolithocholate sulfate*	Lipid	Secondary Bile Acid Metabolism	32620	LC/MS Neg	100001657	5015	512.3	15324-64-8	72222	65188	C11301	HMDB02639
2098	glycoursodeoxycholate	Lipid	Secondary Bile Acid Metabolism	39379	LC/MS Neg	100002911	5018.1	448.4	64480-66-6	12310288	19973534		HMDB00708
2900	heme	Cofactors and Vitamins	Hemoglobin and Porphyrin Metabolism	41754	LC/MS Pos	100001386	5057	616.2	14875-96-8	26945		C00032	HMDB03178
1055	heptanoate (7:0)	Lipid	Medium Chain Fatty Acid	1644	LC/MS Neg	925	3695	129.2	111-14-8	8094	7803	C17714	HMDB00666
1206	hexadecanedioate	Lipid	Fatty Acid, Dicarboxylate	35678	LC/MS Neg	100001614	4650	285.2	505-54-4	10459	10027	C19615	HMDB00672
1289	hexanoylcarnitine	Lipid	Fatty Acid Metabolism(Acyl Carnitine)	32328	LC/MS Pos	100000781	3174	260.2	6920-35-0	6426853	4932273		HMDB00705
2931	hippurate	Xenobiotics	Benzoate Metabolism	15753	LC/MS Neg	100000014	2136	178.1	495-69-2	464	451	C01586	HMDB00714
58	histidine	Amino Acid	Histidine Metabolism	59	LC/MS Neg	355	757	154.1	5934-29-2	6274	752	C00135	HMDB00177
3566	hydroxypioglitazone (M-IV)	Xenobiotics	Drug	43580	LC/MS Neg	100004177	4072	371.2	146062-44-4
2905	I-urobilinogen	Cofactors and Vitamins	Hemoglobin and Porphyrin Metabolism	32426	LC/MS Neg	100001226	4181	591.3	14684-37-8	26818	24980	C05790	HMDB04157
3460	ibuprofen	Xenobiotics	Drug	17799	LC/MS Neg	1487	4951	205.1	15687-27-1	3672	3544	D00126	HMDB01925
3459	ibuprofen acyl glucuronide	Xenobiotics	Drug	38326	LC/MS Neg	100002406	4969	381.2	115075-59-7	163959	143793
221	indolelactate	Amino Acid	Tryptophan Metabolism	18349	LC/MS Pos	100000463	3519	206.1	832-97-3	92904	83867	C02043	HMDB00671
2682	inosine	Nucleotide	Purine Metabolism, (Hypo)Xanthine/Inosine containing	1123	LC/MS Neg	361	1600	267.2	58-63-9	6021	21241953	C00294	HMDB00195
969	Isobar: glucose, fructose, mannose, galactose, allose, altrose, etc.	Carbohydrate	Fructose, Mannose and Galactose Metabolism	32999	LC/MS Neg	100004490	708	179.2
310	isobutyrylcarnitine	Amino Acid	Leucine, Isoleucine and Valine Metabolism	33441	LC/MS Pos	100001055	1941	232.2	25518-49-4	168379			HMDB00736
293	isoleucine	Amino Acid	Leucine, Isoleucine and Valine Metabolism	1125	LC/MS Pos	376	1614	132.1	73-32-5	6306	769	C00407	HMDB00172
609	isoleucylglycine	Peptide	Dipeptide	40008	LC/MS Pos	100003169	1732	189.2	868-28-0	342532	303621
271	isovalerate	Amino Acid	Leucine, Isoleucine and Valine Metabolism	34732	LC/MS Neg	100000708	1623	101.2	503-74-2	10430	10001	C08262	HMDB00718
273	isovalerylcarnitine	Amino Acid	Leucine, Isoleucine and Valine Metabolism	34407	LC/MS Pos	100001393	2533	246.2	31023-24-2	6426851	4932271		HMDB00688
3574	ketamine	Xenobiotics	Drug	35128	LC/MS Pos	100001503	2907	238.1	6740-88-1	3821	3689	C07525	HMDB15352
3577	ketopioglitazone	Xenobiotics	Drug	43579	LC/MS Neg	100004176	4135	369.2	146062-45-5
227	kynurenine	Amino Acid	Tryptophan Metabolism	15140	LC/MS Pos	100000265	1902	209.1	2922-83-0	161166	141580	C00328	HMDB00684
2907	L-urobilin	Cofactors and Vitamins	Hemoglobin and Porphyrin Metabolism	40173	LC/MS Pos	100002568	4091	595.4	34217-90-8	5280818	4444369	C05793	HMDB04159
859	lactate	Carbohydrate	Glycolysis, Gluconeogenesis, and Pyruvate Metabolism	33830	LC/MS Neg	482	670	89.1	79-33-4	612	592	C00186	HMDB00190
1061	laurate (12:0)	Lipid	Medium Chain Fatty Acid	1645	LC/MS Neg	181	5288	199.3	143-07-7	3893	3756	C02679	HMDB00638
265	leucine	Amino Acid	Leucine, Isoleucine and Valine Metabolism	60	LC/MS Pos	397	1674	132.2	61-90-5	6106	5880	C00123	HMDB00687
1238	linoleamide (18:2n6)	Lipid	Fatty Acid, Amide	32455	LC/MS Pos	1492	5639	280.2	3999-01-07	6435901	4940587
1108	linoleate (18:2n6)	Lipid	Polyunsaturated Fatty Acid (n3 and n6)	1105	LC/MS Neg	180	5533	279.3	60-33-3	5280450	4444105	C01595	HMDB00673
1110	linolenate [alpha or gamma; (18:3n3 or 6)]	Lipid	Polyunsaturated Fatty Acid (n3 and n6)	34035	LC/MS Neg	100001337	5450	277.3		5280934	4444437	C06426	HMDB03073
80	lysine	Amino Acid	Lysine Metabolism	1301	LC/MS Pos	407	603	147.2	56-87-1	5962	5747	C00047	HMDB00182
1038	malate	Energy	TCA Cycle	1303	LC/MS Neg	409	603	133.1	6915-15-7	525	510	C00149	HMDB00156
1070	margarate (17:0)	Lipid	Long Chain Fatty Acid	1121	LC/MS Neg	891	5733	269.3	506-12-7	10465	10033		HMDB02259
1119	mead acid (20:3n9)	Lipid	Polyunsaturated Fatty Acid (n3 and n6)	35174	LC/MS Neg	100001472	5642	305.4	20590-32-3	5312531	4471956		HMDB10378
325	methionine	Amino Acid	Methionine, Cysteine, SAM and Taurine Metabolism	1302	LC/MS Pos	415	1252	150.1	63-68-3	6137	5907	C00073	HMDB00696
2990	methyl-4-hydroxybenzoate sulfate	Xenobiotics	Benzoate Metabolism	48429	LC/MS Neg	100006116	2863	230.997
3591	metoprolol	Xenobiotics	Drug	18037	LC/MS Pos	2028	3205	268.2	56392-17-7	4171	4027	D02358	HMDB01932
3593	metoprolol acid metabolite*	Xenobiotics	Drug	34109	LC/MS Pos	100001385	2535	268.2	56392-14-4	62936	56653
1064	myristate (14:0)	Lipid	Long Chain Fatty Acid	1365	LC/MS Neg	519	5439	227.3	544-63-8	11005	10539	C06424	HMDB00806
1065	myristoleate (14:1n5)	Lipid	Long Chain Fatty Acid	32418	LC/MS Neg	100001198	5338	225.3	544-64-9	5281119	4444564	C08322	HMDB02000
1296	myristoylcarnitine	Lipid	Fatty Acid Metabolism(Acyl Carnitine)	33952	LC/MS Pos	100001270	5113	372.4	18822-89-4	53477791	4932274		HMDB05066
2788	N-acetyl-beta-alanine	Nucleotide	Pyrimidine Metabolism, Uracil containing	37432	LC/MS Pos	100002102	1460	132.1	3025-95-4	76406	68881	C01073
28	N-acetylalanine	Amino Acid	Alanine and Aspartate Metabolism	1585	LC/MS Neg	1110	882	130.1	97-69-8	88064	79449	C02847	HMDB00766
449	N-acetylcarnosine	Peptide	Dipeptide Derivative	43488	LC/MS Pos	100004046	1145	269.2	56353-15-2	9903482	8079136		HMDB12881
326	N-acetylmethionine	Amino Acid	Methionine, Cysteine, SAM and Taurine Metabolism	1589	LC/MS Pos	1083	2588	192.1	65-82-7	448580	395338	C02712	HMDB11745
15	N-acetylthreonine	Amino Acid	Glycine, Serine and Threonine Metabolism	33939	LC/MS Neg	100001274	846	160.1	17093-74-2	152204	3841173
378	N-delta-acetylornithine*	Amino Acid	Urea cycle; Arginine and Proline Metabolism	43249	LC/MS Pos	100004523	836.2	175.1		9920500	8096135
3878	N-methylpipecolate	Xenobiotics	Chemical	47101	LC/MS Pos	100005383	1142	144.2	41447-17-0	11862129;11286529	9461516
382	N-methylproline	Amino Acid	Urea cycle; Arginine and Proline Metabolism	37431	LC/MS Pos	100001956	833	130.1	475-11-6	557	541
2843	N1-Methyl-2-pyridone-5-carboxamide	Cofactors and Vitamins	Nicotinate and Nicotinamide Metabolism	40469	LC/MS Pos	100001468	1707.3	153.2	701-44-0	69698	62899	C05842	HMDB04193
2710	N1-methyladenosine	Nucleotide	Purine Metabolism, Adenine containing	15650	LC/MS Pos	1242	1356	282.1	15763-06-1	27476	4573813	C02494	HMDB03331
2746	N2,N2-dimethylguanosine	Nucleotide	Purine Metabolism, Guanine containing	35137	LC/MS Pos	100001412	2157	312.1	2140-67-2	92919	83878		HMDB04824
82	N6-acetyllysine	Amino Acid	Lysine Metabolism	36752	LC/MS Pos	100001734	1134	189.1	692-04-6	92832	83801	C02727	HMDB00206
1080	nonadecanoate (19:0)	Lipid	Long Chain Fatty Acid	1356	LC/MS Neg	892	6073	297.3	646-30-0	12591	12071	C16535	HMDB00772
3772	O-sulfo-L-tyrosine	Xenobiotics	Chemical	45413	LC/MS Neg	100005384	1006.1	260.1		514186	448617
1207	octadecanedioate	Lipid	Fatty Acid, Dicarboxylate	36754	LC/MS Neg	100001615	5033	313.3	871-70-5	70095	63283		HMDB00782
1290	octanoylcarnitine	Lipid	Fatty Acid Metabolism(Acyl Carnitine)	33936	LC/MS Pos	100001247	4100	288.3	3671-77-0	123701	110274	C02838	HMDB00791
1235	oleamide	Lipid	Fatty Acid, Amide	32458	LC/MS Pos	1504	5766	282.3	301-02-0	5283387	4446508	C19670	HMDB02117
1074	oleate (18:1n9)	Lipid	Long Chain Fatty Acid	1359	LC/MS Neg	442	5660	281.3	112-80-1	445639	393217	C00712	HMDB00207
1302	oleoylcarnitine	Lipid	Fatty Acid Metabolism(Acyl Carnitine)	35160	LC/MS Pos	100001501	5202	426.4	38677-66-6	6441392;53477789	21403150		HMDB05065
3611	omeprazole	Xenobiotics	Drug	38600	LC/MS Neg	100002725	4643.8	344.1	73590-58-6	4594	4433	C07324	HMDB01913
142	p-cresol sulfate	Amino Acid	Phenylalanine and Tyrosine Metabolism	36103	LC/MS Neg	100001315	2896	187.1	3233-57-7	4615423	3806480	C01468	HMDB11635
1067	palmitate (16:0)	Lipid	Long Chain Fatty Acid	1336	LC/MS Neg	424	5619	255.3	57-10-3	985	960	C00249	HMDB00220
1234	palmitic amide	Lipid	Fatty Acid, Amide	42095	LC/MS Pos	100003915	5758	256.3	629-54-9	69421	62629
1068	palmitoleate (16:1n7)	Lipid	Long Chain Fatty Acid	33447	LC/MS Neg	452	5477	253.3	373-49-9	445638	393216	C08362	HMDB03229
1455	palmitoyl ethanolamide	Lipid	Endocannabinoid	38165	LC/MS Neg	1489	6416	298.4	544-31-0	4671	4509	C16512	HMDB02100
1298	palmitoylcarnitine	Lipid	Fatty Acid Metabolism(Acyl Carnitine)	22189	LC/MS Pos	100000776	5179	400.4	6865-14-1	461	448	C02990	HMDB00222
2849	pantothenate	Cofactors and Vitamins	Pantothenate and CoA Metabolism	1508	LC/MS Pos	1024	2218	220.1	137-08-6	6613	6361	C00864	HMDB00210
2996	paraxanthine	Xenobiotics	Xanthine Metabolism	18254	LC/MS Pos	100000453	2444	181.2	611-59-6	4687	4525	C13747	HMDB01860
1057	pelargonate (9:0)	Lipid	Medium Chain Fatty Acid	12035	LC/MS Neg	437	4847	157.2	112-05-0	8158	4574394	C01601	HMDB00847
3619	phenobarbital	Xenobiotics	Drug	27733	LC/MS Neg	100001045	3197	231.1	50-06-6	4763	4599	C07434	HMDB15305
139	phenol sulfate	Amino Acid	Phenylalanine and Tyrosine Metabolism	32553	LC/MS Neg	100001510	2150	173.1	937-34-8	74426	67018	C02180	HMDB60015
121	phenylacetylglutamine	Amino Acid	Phenylalanine and Tyrosine Metabolism	35126	LC/MS Pos	100001417	2868	265.2	28047-15-6	92258	270643	C04148	HMDB06344
108	phenylalanine	Amino Acid	Phenylalanine and Tyrosine Metabolism	64	LC/MS Pos	460	2056	166.1	63-91-2	6140	5910	C00079	HMDB00159
113	phenyllactate (PLA)	Amino Acid	Phenylalanine and Tyrosine Metabolism	22130	LC/MS Neg	100000774	2237	165.1	828-01-3	3848	3715	C05607	HMDB00779
1052	phosphate	Energy	Oxidative Phosphorylation	34425	LC/MS Neg	461	627	97.1	7664-38-2	1061	1032	C00009	HMDB01429
3623	pioglitazone*	Xenobiotics	Drug	33139	LC/MS Pos	100001317	3686	357.1	112529-15-4	4829	4663	C07675	HMDB15264
98	pipecolate	Amino Acid	Lysine Metabolism	1444	LC/MS Pos	1025	1120	130.1	4043-87-2	849	826	C00408	HMDB00070
3282	piperine	Xenobiotics	Food Component/Plant	33935	LC/MS Pos	100001267	5136	286.2	94-62-2	638024	553590	C03882	HMDB29377
1974	pregn steroid monosulfate*	Lipid	Steroid	32619	LC/MS Neg	100002067	4998	397.3	1247-64-9		13465233
1973	pregnen-diol disulfate*	Lipid	Steroid	32562	LC/MS Neg	100001993	3886	238.3
1946	pregnenolone sulfate	Lipid	Steroid	38170	LC/MS Neg	100002129	5089	395.3	1247-64-9	105074	94802		HMDB00774
386	pro-hydroxy-pro	Amino Acid	Urea cycle; Arginine and Proline Metabolism	35127	LC/MS Pos	100001167	960	229.2	18684-24-7	11673055	9847785		HMDB06695
366	proline	Amino Acid	Urea cycle; Arginine and Proline Metabolism	1898	LC/MS Pos	480	796	116.1	147-85-3	145742	128566	C00148	HMDB00162
1271	propionylcarnitine	Lipid	Fatty Acid Metabolism (also BCAA Metabolism)	32452	LC/MS Pos	100001162	1589	218.2	17298-37-2	107738	96904	C03017	HMDB00824
2992	propyl 4-hydroxybenzoate sulfate	Xenobiotics	Benzoate Metabolism	48460	LC/MS Neg	100006264	3983	259.028	162338-10-5
3630	pseudoephedrine	Xenobiotics	Drug	39586	LC/MS Pos	100002738	2328.5	166.1	90-82-4	7028	6761	C02765	HMDB01943
2772	pseudouridine	Nucleotide	Pyrimidine Metabolism, Uracil containing	33442	LC/MS Neg	821	1104	243.1	1445-07-4	15047	21403010	C02067	HMDB00767
2929	pyridoxate	Cofactors and Vitamins	Vitamin B6 Metabolism	31555	LC/MS Neg	100001121	2210	182.1	82-82-6	6723	6467	C00847	HMDB00017
53	pyroglutamine*	Amino Acid	Glutamate Metabolism	32672	LC/MS Pos	100001540	764	129.2	2353-44-8	134508	118562
858	pyruvate	Carbohydrate	Glycolysis, Gluconeogenesis, and Pyruvate Metabolism	42582	LC/MS Neg	823	727	87.1	127-17-3	1060	96901	C00022	HMDB00243
3634	ranitidine	Xenobiotics	Drug	38595	LC/MS Pos	100002735	1967	315.1	66357-59-3	3001055	2272523	D00422	HMDB01930
345	S-methylcysteine	Amino Acid	Methionine, Cysteine, SAM and Taurine Metabolism	39592	LC/MS Pos	100002749	869.1	136	1187-84-4	24417	22826		HMDB02108
3297	saccharin	Xenobiotics	Food Component/Plant	21151	LC/MS Neg	100000870	2013	182.1	81-07-2	5143	4959	D01085	HMDB29723
3640	salicylate	Xenobiotics	Drug	1515	LC/MS Neg	501	2226	137.1	69-72-7	338	331	C00805	HMDB01895
3458	salicyluric glucuronide*	Xenobiotics	Drug	33384	LC/MS Neg	100001332	1463	370.1			21403117
1201	sebacate (decanedioate)	Lipid	Fatty Acid, Dicarboxylate	32398	LC/MS Neg	100001211	1778	201.2	111-20-6	5192	5004	C08277	HMDB00792
1856	sphingosine	Lipid	Sphingolipid Metabolism	17747	LC/MS Pos	297	5197	300.2	123-78-4	5353955	4510275	C00319	HMDB00252
1855	sphingosine 1-phosphate	Lipid	Sphingolipid Metabolism	34445	LC/MS Pos	100000626	5512	380.2	26993-30-6	5283560	4446673	C06124	HMDB00277
3315	stachydrine	Xenobiotics	Food Component/Plant	34384	LC/MS Pos	100001296	860	144.1	4136-37-2	115244	103115	C10172	HMDB04827
1237	stearamide	Lipid	Fatty Acid, Amide	37487	LC/MS Pos	100002105	5968	284.5	124-26-5	31292	29032	C13846	HMDB34146
1072	stearate (18:0)	Lipid	Long Chain Fatty Acid	1358	LC/MS Neg	439	5886	283.4	57-11-4	5281	5091	C01530	HMDB00827
1101	stearidonate (18:4n3)	Lipid	Polyunsaturated Fatty Acid (n3 and n6)	33969	LC/MS Neg	100001229	5381	275.3	111174-40-4	5312508	4471933	C16300	HMDB06547
1300	stearoylcarnitine	Lipid	Fatty Acid Metabolism(Acyl Carnitine)	34409	LC/MS Pos	100001391	5300	428.4	18822-91-8	6426855	21233653		HMDB00848
1036	succinate	Energy	TCA Cycle	1437	LC/MS Neg	252	618	117.1	110-15-6	1110	1078	C00042	HMDB00254
1035	succinylcarnitine	Energy	TCA Cycle	37058	LC/MS Pos	100001948	1401	262.1
2073	taurochenodeoxycholate	Lipid	Primary Bile Acid Metabolism	18494	LC/MS Neg	1629	5218	498.3	6009-98-9	387316	343282	C05465	HMDB00951
2070	taurocholate	Lipid	Primary Bile Acid Metabolism	18497	LC/MS Neg	1648	5122	514.3	145-42-6	6675		C05122	HMDB00036
2116	taurocholenate sulfate*	Lipid	Secondary Bile Acid Metabolism	32807	LC/MS Neg	100001990	4762	279.8
2088	taurodeoxycholate	Lipid	Secondary Bile Acid Metabolism	12261	LC/MS Neg	1668	5243	498.3	207737-97-1	2733768	2015539	C05463	HMDB00896
2107	taurohyocholate	Lipid	Secondary Bile Acid Metabolism	42603	LC/MS Neg	100004084	5000	514.3
2095	taurolithocholate 3-sulfate	Lipid	Secondary Bile Acid Metabolism	36850	LC/MS Neg	100001658	5002	280.8	64936-83-0	440071	389078	C03642	HMDB02580
2099	tauroursodeoxycholate	Lipid	Secondary Bile Acid Metabolism	39378	LC/MS Neg	100002912	5002.6	498.4	14605-22-2	9848818	24539842		HMDB00874
1205	tetradecanedioate	Lipid	Fatty Acid, Dicarboxylate	35669	LC/MS Neg	100001613	3970	257.2	821-38-5	13185	12630		HMDB00872
2997	theobromine	Xenobiotics	Xanthine Metabolism	18392	LC/MS Pos	100000445	2136	181.1	83-67-0	5429	5236	C07480	HMDB02825
2998	theophylline	Xenobiotics	Xanthine Metabolism	18394	LC/MS Pos	100000437	2495	181.1	58-55-9	2153	2068	C07130	HMDB01889
14	threonine	Amino Acid	Glycine, Serine and Threonine Metabolism	1284	LC/MS Pos	564	713	120.1	72-19-5	6288	6051	C00188	HMDB00167
384	trans-4-hydroxyproline	Amino Acid	Urea cycle; Arginine and Proline Metabolism	32306	LC/MS Pos	1001	705	132.1	51-35-4	5810	5605	C01157	HMDB00725
3327	traumatic acid	Xenobiotics	Food Component/Plant	42964	LC/MS Neg	100004226	2877	227.2	6402-36-4	5283028	4446155	C16308	HMDB00933
217	tryptophan	Amino Acid	Tryptophan Metabolism	54	LC/MS Pos	565	2445	205.1	73-22-3	6305	6066	C00078	HMDB00929
251	tryptophan betaine	Amino Acid	Tryptophan Metabolism	37097	LC/MS Pos	100001743	2464	247.1	20671-76-5	442106	390633	C09213	HMDB61115
123	tyrosine	Amino Acid	Phenylalanine and Tyrosine Metabolism	1299	LC/MS Pos	815	1516	182.1	60-18-4	6057	5833	C00082	HMDB00158
1059	undecanoate (11:0)	Lipid	Medium Chain Fatty Acid	12067	LC/MS Neg	889	5207	185.2	334-48-5	8180	7888	C17715	HMDB00947
2691	urate	Nucleotide	Purine Metabolism, (Hypo)Xanthine/Inosine containing	1604	LC/MS Neg	1134	769	167.1	69-93-2;120K5305	1175		C00366	HMDB00289
363	urea	Amino Acid	Urea cycle; Arginine and Proline Metabolism	32623	LC/MS Pos	533	716	121.2	57-13-6	1176	1143	C00086	HMDB00294
2770	uridine	Nucleotide	Pyrimidine Metabolism, Uracil containing	606	LC/MS Neg	535	1430	243.1	58-96-8	6029	5807	C00299	HMDB00296
2097	ursodeoxycholate	Lipid	Secondary Bile Acid Metabolism	1605	LC/MS Neg	1135	5037	391.3	128-13-2	31401	29131	C07880	HMDB00946
307	valine	Amino Acid	Leucine, Isoleucine and Valine Metabolism	1649	LC/MS Pos	566	1040	118.1	72-18-4	6287	6050	C00183	HMDB00883
3441	vancomycin	Xenobiotics	Drug	39798	LC/MS Pos	100002992	2153.1	724.9	123409-00-7	14969	14253
	X - 02249			32587	LC/MS Neg		4025	267.2
	X - 02269			32786	LC/MS Pos		3874	239.1
	X - 07765			32560	LC/MS Neg		3705	245.1
	X - 09789			32753	LC/MS Neg		2613	153.1
	X - 11261			32578	LC/MS Pos		3600	286.2
	X - 11299			32616	LC/MS Neg		4893	507.2
	X - 11308			32625	LC/MS Neg		5163	365.3
	X - 11315			32632	LC/MS Pos		1210	130.2
	X - 11372			32689	LC/MS Neg		5303	467.4
	X - 11407			32724	LC/MS Pos		3385	188.1
	X - 11429			32746	LC/MS Neg		1151	245.1
	X - 11438			32755	LC/MS Neg		3092	241.2
	X - 11440			32757	LC/MS Neg		3571	246.3
	X - 11441			32758	LC/MS Neg		3773	331.1
	X - 11442			32759	LC/MS Neg		3902	331.1
	X - 11444			32761	LC/MS Neg		3983	541.2
	X - 11478			32795	LC/MS Neg		4286	165.2
	X - 11483			32800	LC/MS Neg		4443	505.2
	X - 11521			32838	LC/MS Pos		3650	286.2
	X - 11522			32839	LC/MS Neg		4754	313.2
	X - 11529			32846	LC/MS Neg		4845	624.3
	X - 11530			32847	LC/MS Neg		4866	313.2
	X - 11538			32855	LC/MS Neg		4920	311.3
	X - 11787			33132	LC/MS Pos		1126	148.1
	X - 11793			33138	LC/MS Pos		3634	601.1
	X - 11795			33140	LC/MS Pos		1457	148.1
	X - 11801			33146	LC/MS Pos		4454	355.1
	X - 11820			33165	LC/MS Pos		4780	948.3
	X - 11849			33194	LC/MS Neg		3229	266.2
	X - 11851			33196	LC/MS Neg		3329	423
	X - 11876			33221	LC/MS Neg		5257	635.3
	X - 11880			33225	LC/MS Neg		5378	537.4
	X - 11905			33250	LC/MS Neg		4401	283.2
	X - 11977			33323	LC/MS Pos		3287	270.1
	X - 12056			33408	LC/MS Pos		1129	156.2
	X - 12095			33510	LC/MS Pos		1638	153.1
	X - 12100			33515	LC/MS Pos		1793	221.1
	X - 12101			33516	LC/MS Pos		1646	164.1
	X - 12212			33633	LC/MS Neg		3607	229.1
	X - 12468			33913	LC/MS Pos		2085	240.1
	X - 12739			34349	LC/MS Neg		2414	241.2
	X - 12740			34350	LC/MS Neg		2499	287.1
	X - 12742			34352	LC/MS Neg		2534	241.2
	X - 12776			34453	LC/MS Neg		665	119.1
	X - 12802			34485	LC/MS Pos		2731	318.2
	X - 12816			34499	LC/MS Neg		2676	495.3
	X - 12844			34527	LC/MS Neg		4168	539.3
	X - 12850			34533	LC/MS Neg		4847	263.8
	X - 12851			34535	LC/MS Neg		4886	624.4
	X - 12855			34539	LC/MS Pos		1404	248.2
	X - 13007			34692	LC/MS Neg		4584	329.3
	X - 13068			34760	LC/MS Pos		3965	353.1
	X - 13429			35187	LC/MS Neg		4880	263.7
	X - 13457			35220	LC/MS Neg		3621	151.1
	X - 13540			35318	LC/MS Pos		2585	222
	X - 13640			35422	LC/MS Neg		2558	178.2
	X - 13671			35464	LC/MS Neg		5226	315.3
	X - 13891			35786	LC/MS Neg		2716	227.1
	X - 14015			35919	LC/MS Pos		3437	307.1
	X - 14374			36300	LC/MS Pos		2792	197.2
	X - 14473			36399	LC/MS Pos		3363	211.2
	X - 14658			36585	LC/MS Neg		4812	288.8
	X - 14662			36589	LC/MS Neg		4327	263.9
	X - 14939			36966	LC/MS Neg		4355	165.2
	X - 14987			37014	LC/MS Pos		4576	360.9
	X - 15455			37703	LC/MS Pos		1484	462.2
	X - 15461			37709	LC/MS Pos		2125	160.1
	X - 15477			37725	LC/MS Pos		4421	365.2
	X - 15486			37734	LC/MS Neg		3638	269.2
	X - 15492			37740	LC/MS Neg		4698	541.3
	X - 15493			37741	LC/MS Neg		4877	270.3
	X - 15558			37807	LC/MS Pos		4346	342.1
	X - 15559			37808	LC/MS Pos		4418	450.2
	X - 15562			37811	LC/MS Pos		4686	470.1
	X - 15563			37812	LC/MS Pos		4749	490
	X - 15576			37825	LC/MS Pos		3108	454.9
	X - 15595			37844	LC/MS Neg		2124	343
	X - 15601			37850	LC/MS Neg		2711	320.9
	X - 15606			37855	LC/MS Neg		3196	247
	X - 15609			37858	LC/MS Neg		3664	273.1
	X - 15664			37913	LC/MS Neg		3695	469.2
	X - 15675			37924	LC/MS Neg		5116	311.2
	X - 15716			37965	LC/MS Pos		2325	240.1
	X - 15736			37985	LC/MS Neg		4453	240.3
	X - 15999			38440	LC/MS Pos		1885	505.7
	X - 16103			38546	LC/MS Neg		659.1	99.3
	X - 16121			38568	LC/MS Neg		2152.3	807
	X - 16124			38571	LC/MS Neg		2575.1	203
	X - 16439			39010	LC/MS Pos		3795.8	322.1
	X - 16480			39053	LC/MS Neg		4685.5	309.3
	X - 16932			39515	LC/MS Neg		3959.3	469.2
	X - 16934			39517	LC/MS Neg		4488.8	631.1
	X - 16938			39521	LC/MS Neg		2008.8	233.1
	X - 16944			39527	LC/MS Neg		3693.5	141.1
	X - 16946			39529	LC/MS Neg		3262.3	317.1
	X - 16982			39568	LC/MS Pos		1622.9	191.9
	X - 17137			39800	LC/MS Neg		3465.5	449.2
	X - 17138			39802	LC/MS Pos		4104.9	310.2
	X - 17145			39809	LC/MS Neg		3844.7	257.2
	X - 17186			39856	LC/MS Pos		2727.9	233.2
	X - 17188			39858	LC/MS Pos		4163.7	362.2
	X - 17254			39962	LC/MS Neg		5370.7	970.5
	X - 17259			39967	LC/MS Pos		5142.7	241.3
	X - 17327			40125	LC/MS Pos		3601.2	257.2
	X - 17337			40135	LC/MS Pos		4692.5	328.3
	X - 17443			40272	LC/MS Neg		3102.3	271.2
	X - 17445			40274	LC/MS Neg		4515.2	327.8
	X - 17453			40282	LC/MS Pos		4000.6	591.3
	X - 17628			40569	LC/MS Neg		680.8	164.3
	X - 17629			40570	LC/MS Neg		680.6	351.1
	X - 17654			40596	LC/MS Neg		5204.6	365.3
	X - 18778			42153	LC/MS Neg		1841	222.9
	X - 18893			42278	LC/MS Neg		3048.4	335.2
	X - 18897			42282	LC/MS Neg		3499.7	221.2
	X - 18907			42292	LC/MS Neg		4066.7	222.2
	X - 18908			42293	LC/MS Neg		4044.1	295.2
	X - 18913			42298	LC/MS Neg		4550.4	185.1
	X - 18920			42305	LC/MS Neg		4841.8	429.3
	X - 18921			42306	LC/MS Neg		4887	193.2
	X - 18929			42314	LC/MS Pos		3881.1	319.2
	X - 18932			42319	LC/MS Neg		1516.4	199.1
	X - 18938			42325	LC/MS Neg		2294.2	245.2
	X - 19133			42540	LC/MS Neg		2383.2	381.2
	X - 19166			42642	LC/MS Neg		2463.8	247
	X - 19299			42775	LC/MS Neg		3838.5	227.2
	X - 19497			43050	LC/MS Neg		3657.6	227.3
	X - 19500			43053	LC/MS Neg		3892.3	587.4
	X - 19503			43056	LC/MS Neg		4083.5	601.5
	X - 19572			43128	LC/MS Neg		3761.2	431.3
	X - 19778			43438	LC/MS Neg		2500	731.6
	X - 19807			43558	LC/MS Neg		656.2	93
	X - 19808			43559	LC/MS Neg		656.2	95
	X - 20503			45104	LC/MS Neg		1804.5	244.1
	X - 20587			45188	LC/MS Pos		2223.2	279.2
	X - 21047			45903	LC/MS Pos		2036	273
	X - 21202			46191	LC/MS Neg		2620.5	227.2
	X - 21218			46213	LC/MS Neg		4961.1	625.5
	X - 21365			48167	LC/MS Pos		1020	160.2
